# Supplementary material for: Superparamagnetic Ag@Fe3O4 core–shell nanospheres: fabrication, characterization and application as reusable nanocatalysts
Source: Royal Society of Chemistry journal article supplement (doi:10.1039/c2dt12307j), 2012-01-01
Supplement: c2dt12307j.pdf [file c2dt12307j.pdf]

## Supporting Information

### **Superparamagnetic Ag@Fe<sub>3</sub>O<sub>4</sub> core/shell nanosphere: fabrication, characterization and its application as reuseable nanocatalyst**

*Wanquan Jiang<sup>a\*</sup>, Yufeng Zhou<sup>a</sup>, Yanli Zhang<sup>a</sup>, Shouhu Xuan<sup>b</sup>, Xinglong Gong<sup>b\*</sup>*

*<sup>a</sup>Department of Chemistry, University of Science and Technology of China (USTC),  
Hefei 230026, PR China*

*<sup>b</sup>CAS Key Laboratory of Mechanical Behavior and Design of Materials, Department  
of Modern Mechanics, USTC, Hefei 230027, PR China*

*\*Corresponding author: Tel: 86-551-3607605; Fax: 86-551-3600419.*

*E-mail: jiangwq@ustc.edu.cn (W.Q. Jiang), gongxl@ustc.edu.cn (X.L. Gong)*

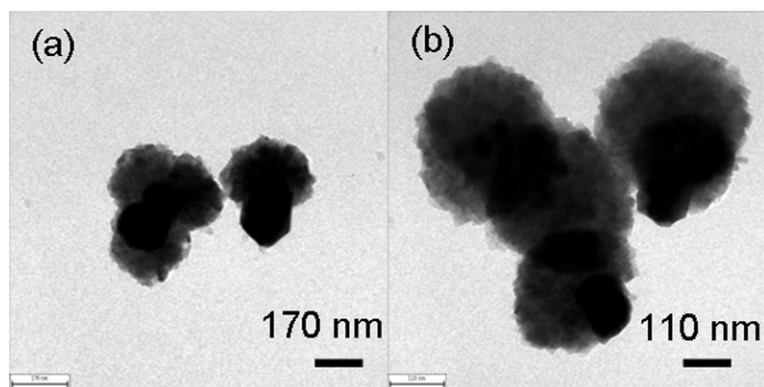

**Figure S11.** TEM images of the Ag@Fe<sub>3</sub>O<sub>4</sub> nanospheres under low Fe<sup>3+</sup> concentration.

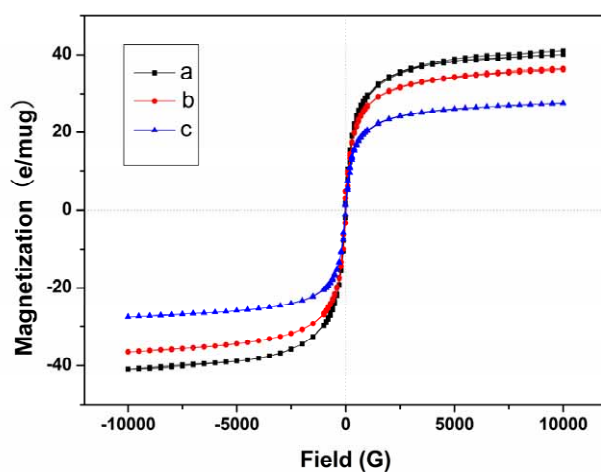

**Figure S12.** Magnetic hysteresis loops of as-prepared Ag@Fe<sub>3</sub>O<sub>4</sub> nanospheres at room temperature with different concentrations of AgNO<sub>3</sub>: (a)  $5.0 \times 10^{-3}$  mol/L, (b)  $1.0 \times 10^{-2}$  mol/L, (c)  $2.5 \times 10^{-2}$  mol/L.
